# Supplementary material
Source: Springer Nature journal article supplement (https://www.springermedizin.de/resource/supplementary/12885_2011_2909_MOESM6_ESM.pdf/9462266)

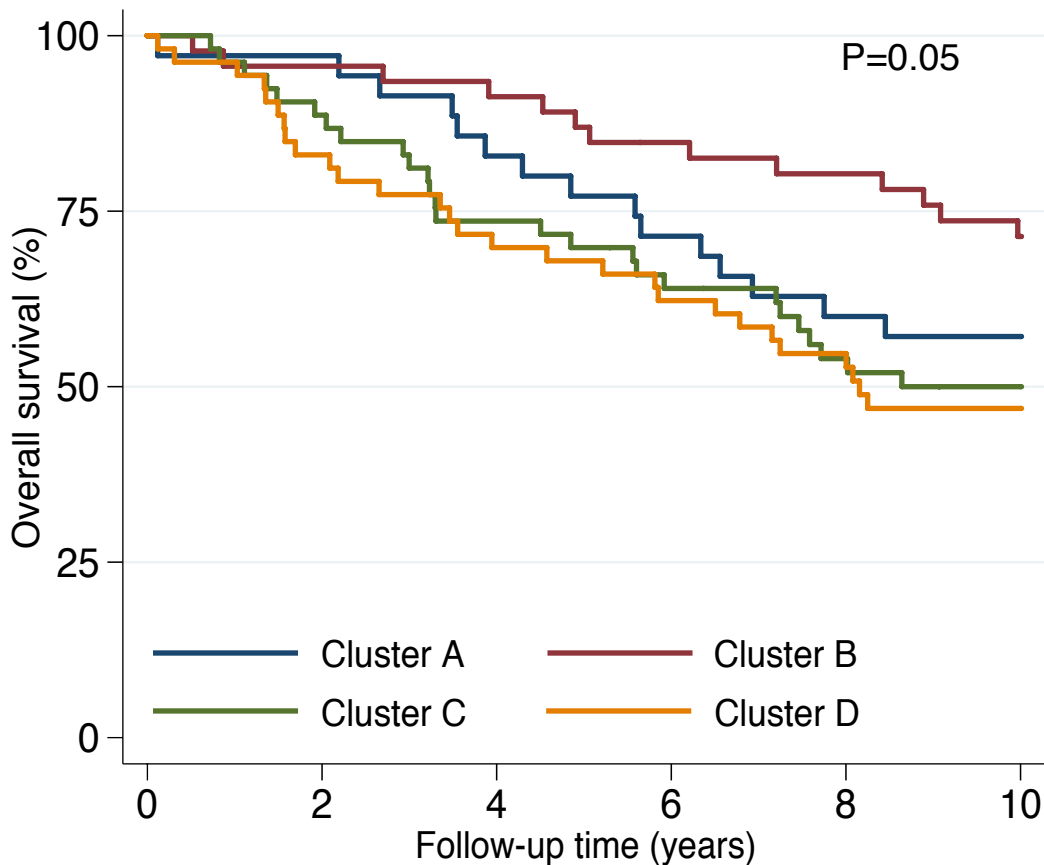

Numbers at risk

|           |    |    |    |    |    |    |
|-----------|----|----|----|----|----|----|
| Cluster A | 35 | 34 | 29 | 25 | 21 | 20 |
| Cluster B | 46 | 44 | 42 | 38 | 36 | 32 |
| Cluster C | 53 | 47 | 39 | 33 | 27 | 24 |
| Cluster D | 53 | 44 | 37 | 33 | 28 | 24 |

Supplement: MOESM6 [file 9462266]
